# Supplementary material
Source: Research Square preprint supplement (doi:10.21203/rs.3.rs-10405906/v1)
Supplement: Supplementary file 1 [file c47caa1f617aee4a5da1eba9.docx]

**Comparative Matrix: Global Impact of a 50% Palm Olein Reduction Policy**

| **Region / Country** | **SFA Profile of Base Oil** | **Simulated CVD Risk Reduction** | **Simulated Economic Friction** | **Impact on Vitamin A / Micronutrients** | **Strategic Agency Relevance** |
| --- | --- | --- | --- | --- | --- |
| **High-Income Countries (HICs)** | 50g SFA / 100g (Invisible UPF ingredient) | **High Benefit** Significant drop in population LDL-C. | **Negligible** Industries easily absorb reformulation costs. | **No Impact** Diets are highly diversified. | **WHO** (Direct alignment with NCD targets) |
| **Nigeria** | 50g SFA / 100g (Primary cooking staple) | **Low-Moderate** Offset by broader nutritional deficits. | **Critical Risk** 22% surge in household oil costs; highly regressive. | **Severe Deficit** 30% drop in Vitamin A access; undermines fortification. | **UNICEF / GAIN / SUN** (High threat to child survival) |
| **Ghana** | 50g SFA / 100g (Primary cooking staple) | **Low-Moderate** Minimal net impact on informal diets. | **High Risk** 15% cost spike; triggers shift to unrefined, low-quality fats. | **High Deficit** Disrupts community-level micronutrient delivery. | **GAIN / SUN** (Threatens local food systems) |
| **Kenya** | 50g SFA / 100g (Urban/Rural staple fat) | **Minimal Benefit** Triggers overall caloric drop instead of healthy substitution. | **High Risk** 12% cost increase; drives caloric restriction in low-income brackets. | **Moderate Deficit** Reduces absorption of fat-soluble vitamins. | **UNICEF** (Exacerbates wasting risks) |
| **South Africa** | 50g SFA / 100g (Industrial & retail oil) | **Moderate Benefit** Reduces SFA intake in urban centers. | **Moderate Risk** Increases reliance on vulnerable domestic soft-oil farming. | **Low Impact** Diverse fortification vectors exist. | **WHO / GAIN** (Viable for targeted industrial caps) |
| **Egypt / Morocco** | 50g SFA / 100g (Blended subsidized oil) | **Moderate-High** Lowers metabolic syndrome biomarkers. | **High Risk** Increases vulnerability to international currency & supply shocks. | **Low Impact** Different native micronutrient vehicles used. | **WHO** (Strong alignment if fiscal buffers exist) |
